# Supplementary material for: Microbial Community Composition in Thermal Waters from the Lindian Geothermal Field (Songliao Basin, North-Eastern China)
Source: MDPI journal article supplement (doi:10.3390/w14040632), 2022-02-18
Supplement: s1 [file s1]

# Microbial Community Composition in Thermal Waters from the Lindian Geothermal Field (Songliao Basin, North-Eastern China)

Fengtian Yang <sup>1,2</sup>, Dong Li <sup>1,2</sup>, Xuejun Zhou <sup>3</sup>, Tao Zhan <sup>3</sup>, Yongfa Ma <sup>3</sup>, Xu Wang <sup>3</sup>, Junling Dong <sup>3</sup>, Ling Liu <sup>3</sup>, Yujia Shi <sup>1,2</sup>, and Yujuan Su <sup>1,2,\*</sup>

## Supplementary Materials

Table S3. Diversity of archaeal and bacterial communities of the thermal waters.

| Community | Sample ID | Sequence number | OTU  | Shannon | Simpson | ACE       | Chao1    | Coverage |
|-----------|-----------|-----------------|------|---------|---------|-----------|----------|----------|
| Archaea   | L01       | 28348           | 1032 | 2.77    | 0.15    | 79508.96  | 25917.06 | 0.97     |
|           | L08       | 48265           | 1587 | 2.45    | 0.3     | 271783.48 | 56458.05 | 0.97     |
|           | L10       | 47344           | 1811 | 2.66    | 0.26    | 403215.41 | 67299.77 | 0.96     |
|           | L50       | 42046           | 1908 | 4.53    | 0.03    | 161269.08 | 49556.61 | 0.96     |
|           | L60       | 39341           | 1960 | 2.94    | 0.17    | 124207.87 | 33652.69 | 0.95     |
| Bacteria  | L01       | 77028           | 2185 | 1.36    | 0.53    | 82316.08  | 25304.45 | 0.97     |
|           | L08       | 98769           | 2266 | 0.79    | 0.81    | 258792.16 | 80566.93 | 0.98     |
|           | L10       | 98023           | 4328 | 3.49    | 0.13    | 26521.99  | 17465.49 | 0.97     |
|           | L50       | 74472           | 2264 | 1.36    | 0.57    | 58793     | 20600.69 | 0.97     |
|           | L60       | 89095           | 2036 | 0.81    | 0.79    | 199697.4  | 46817.67 | 0.98     |

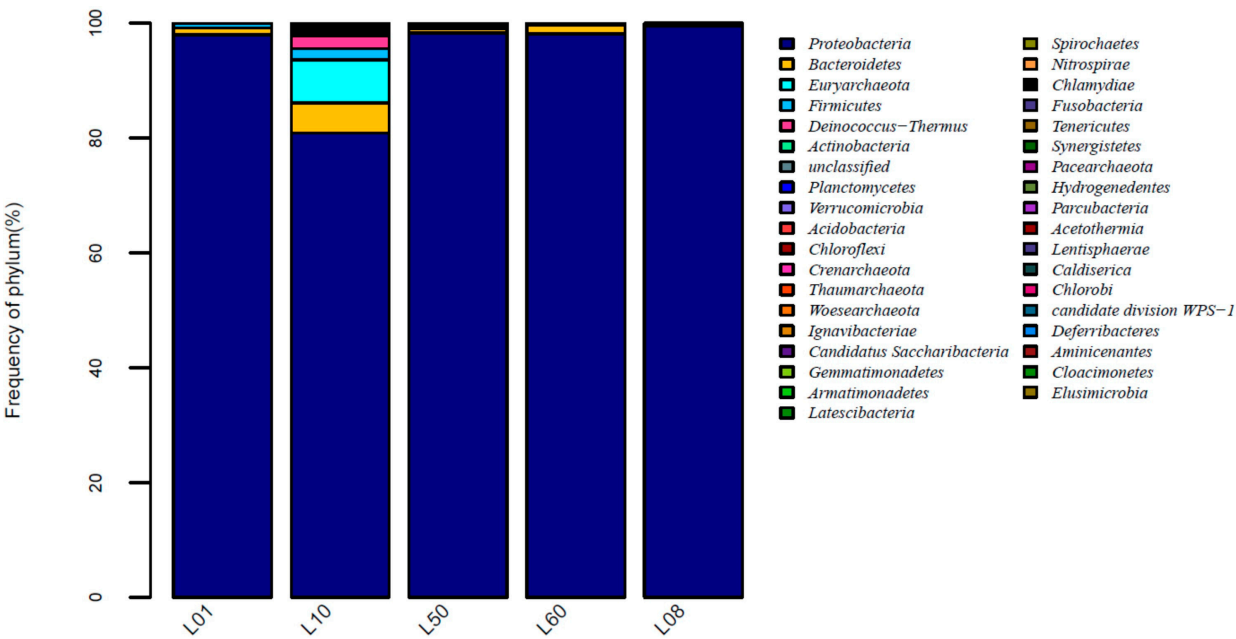

Figure S1. Phylum level bar chart for bacterial taxa

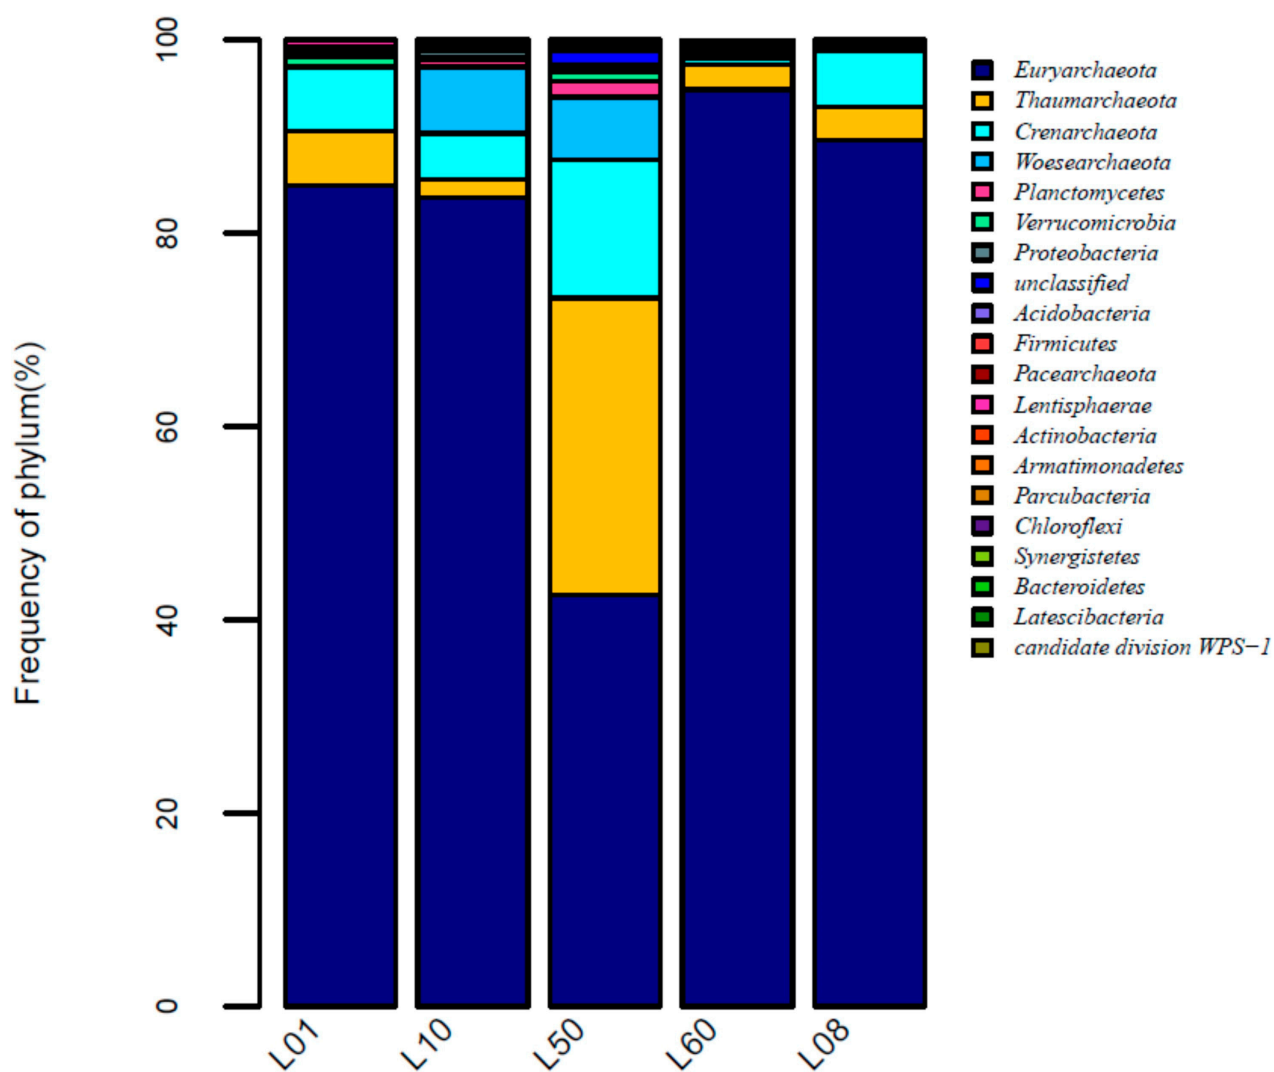

Figure S2. Phylum level bar chart for archaeal taxa.
